# Supplementary material for: A DFT study of methanol dehydrogenation on the PdIn(110) surface
Source: Royal Society of Chemistry journal article supplement (doi:10.1039/c2cp42183f), 2012-01-01
Supplement: c2cp42183f.pdf [file c2cp42183f.pdf]

## A DFT Study of Methanol Dehydrogenation on PdIn(110) Surface

Jingyun Ye,<sup>1,2</sup> Changjun Liu<sup>1</sup> and Qingfeng Ge<sup>2,\*</sup>

<sup>1</sup>School of Chemical Engineering and Technology, Tianjin University, Tianjin, 300072, China, and

<sup>2</sup>Department of Chemistry and Biochemistry, Southern Illinois University, Carbondale, IL, 62901, USA.

\*Corresponding author: Email: [qge@chem.siu.edu](mailto:qge@chem.siu.edu) (Q. Ge)

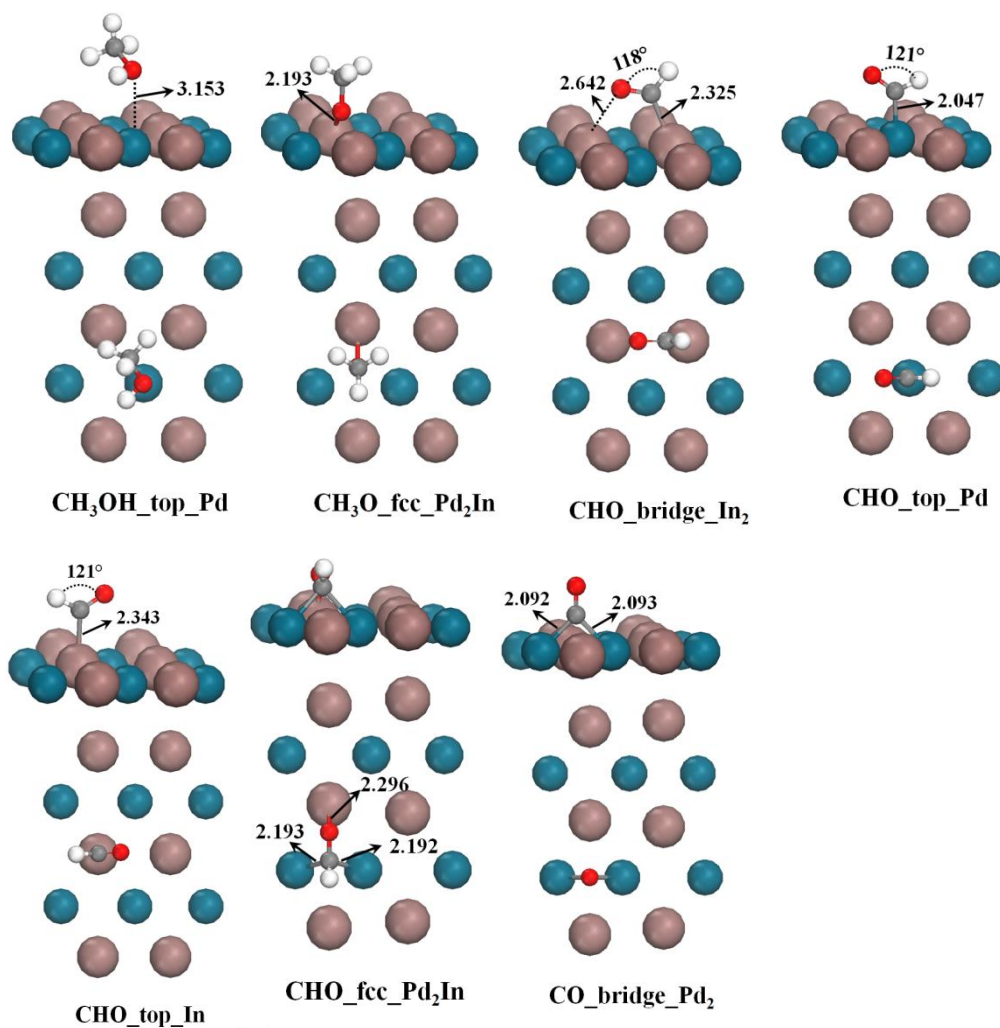

Other less stable optimized adsorption structures of CH<sub>3</sub>OH, CH<sub>3</sub>O, CHO, and CO on the PdIn (110) surface.
